# Supplementary material for: A Longitudinal Exploration of CACNA1A-related Hemiplegic Migraine in Children
Source: bioRxiv or medRxiv preprint supplement (doi:10.1101/2024.06.14.24308953), 2024-06-15

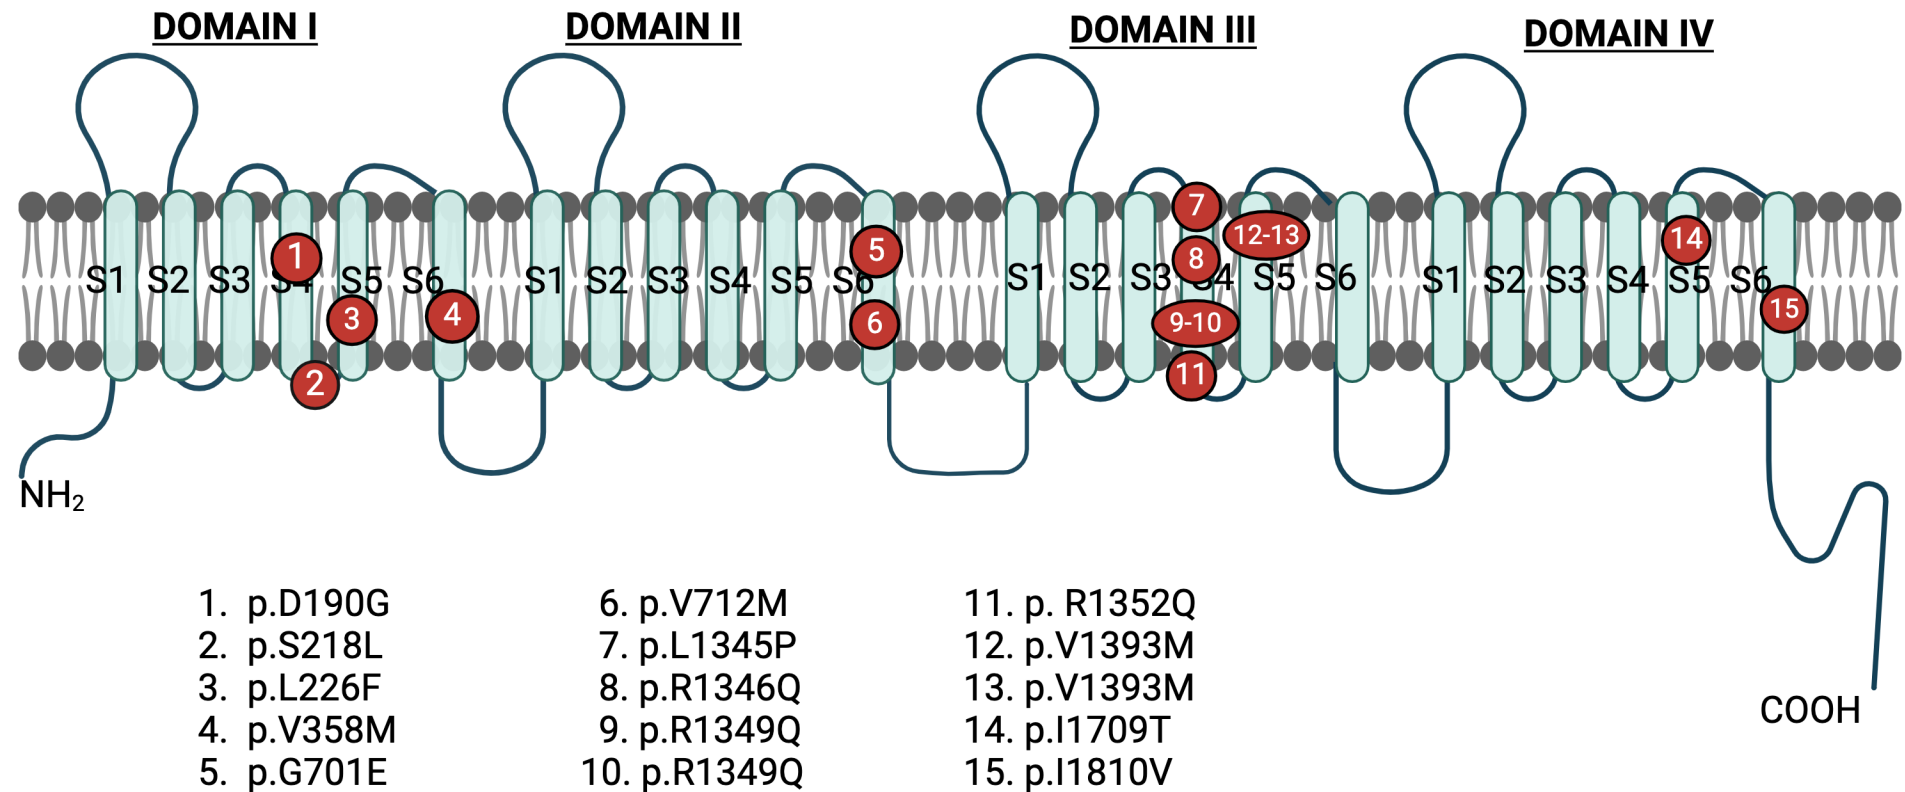

Supplement: Supplementary file [file media-1.pdf]
